# Supplementary material for: Morphologic and Molecular Characterization of Adrenals and Adrenal Rest Affected by Congenital Adrenal Hyperplasia
Source: PubMed Central journal article supplement (PMC8488225; doi:10.3389/fendo.2021.730947), 2021-09-20

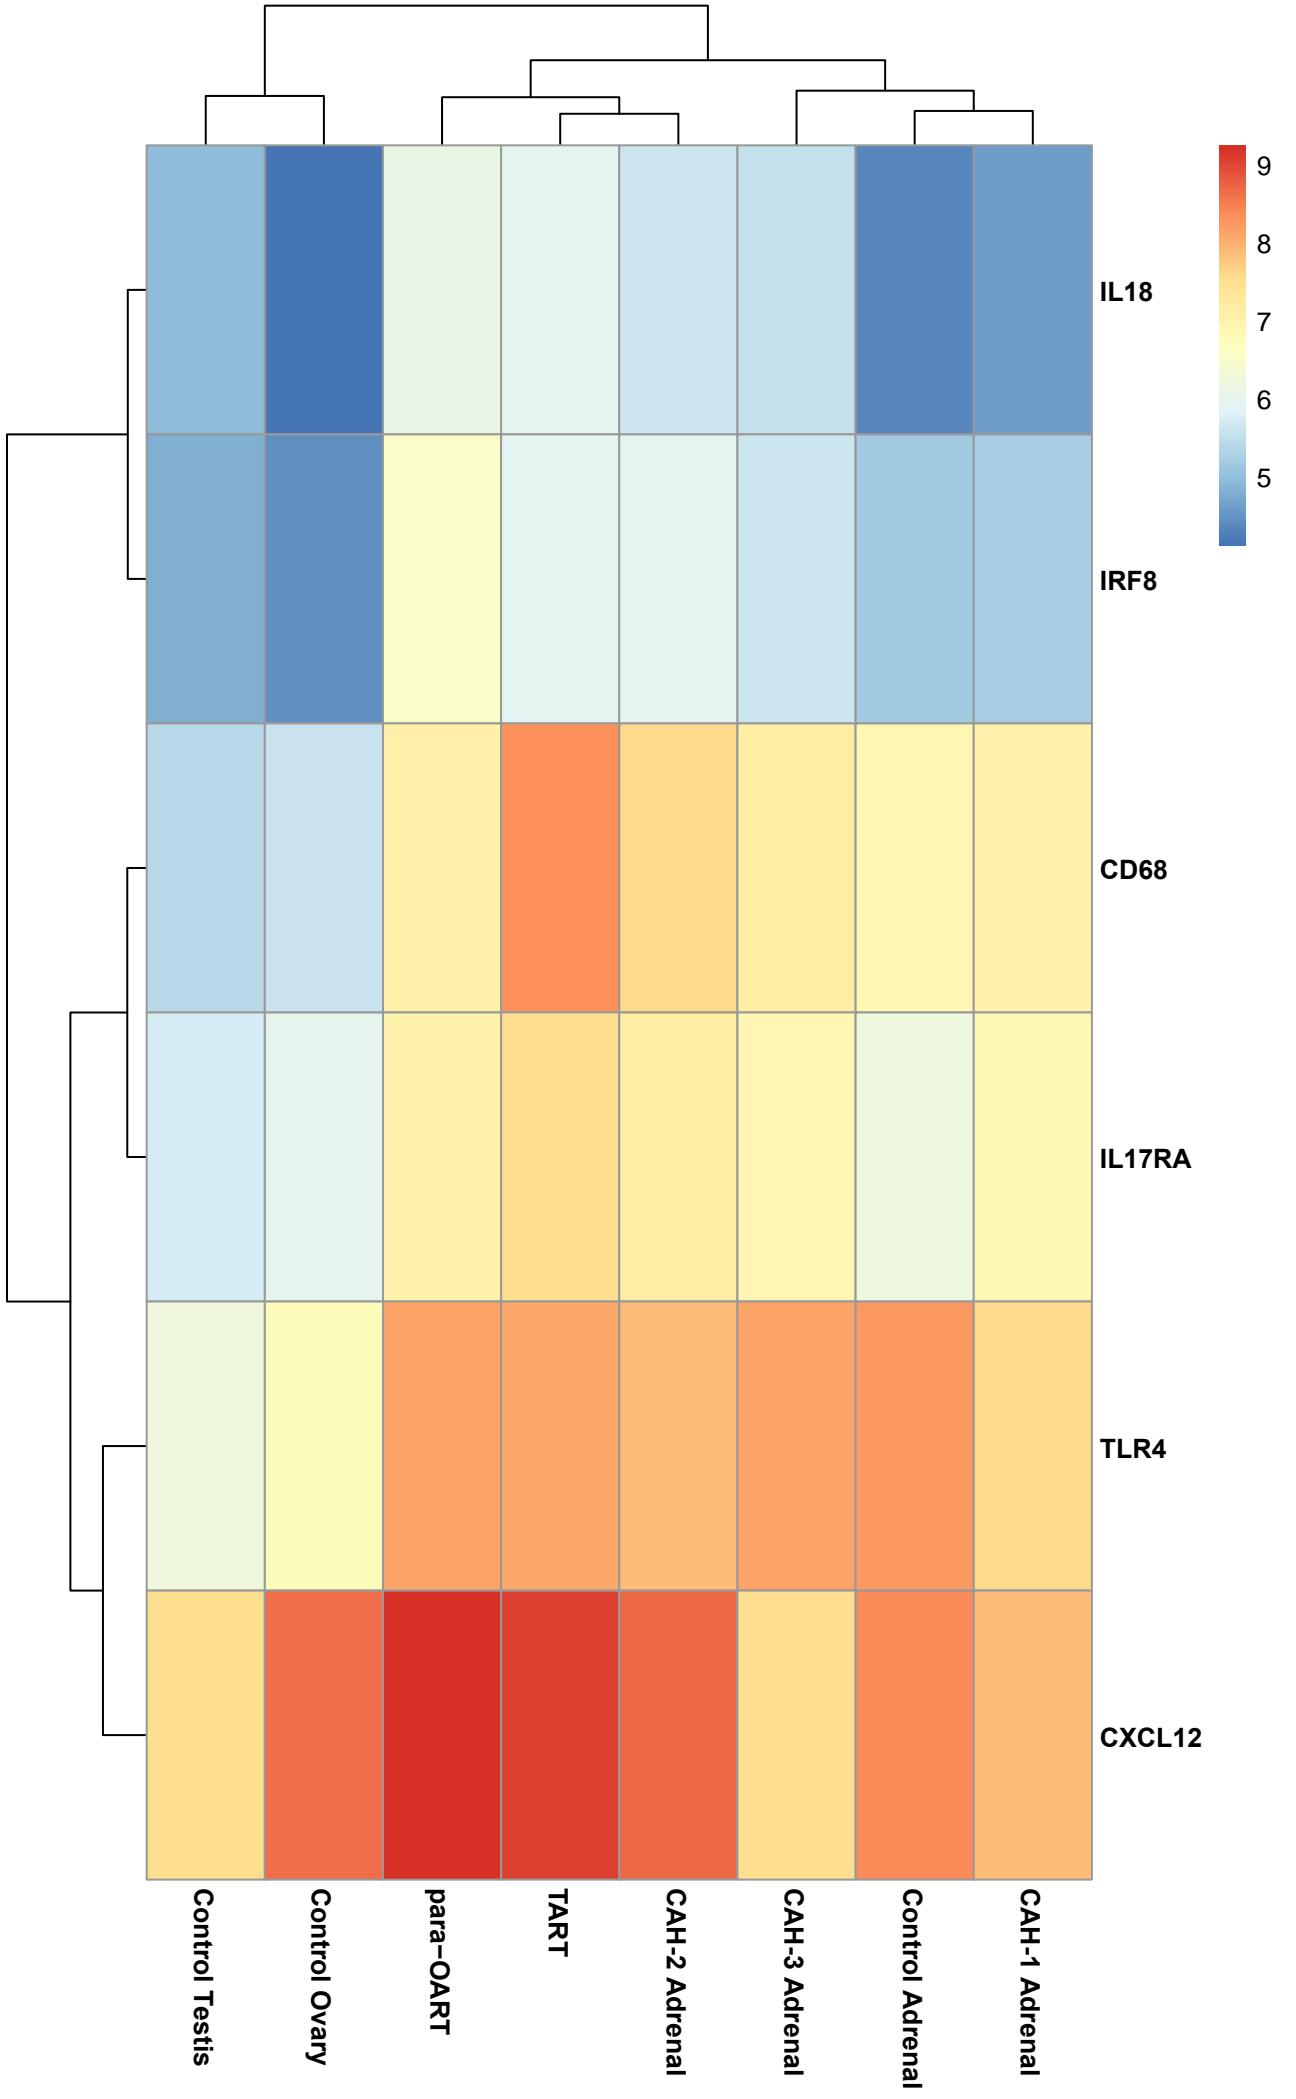

Supplement: Image_2.pdf [file Image_2.pdf]
